# Supplementary material for: Structural and Functional Study of Yer067w, a New Protein Involved in Yeast Metabolism Control and Drug Resistance
Source: PubMed Central journal article supplement (PMC2887356; doi:10.1371/journal.pone.0011163), 2010-06-17

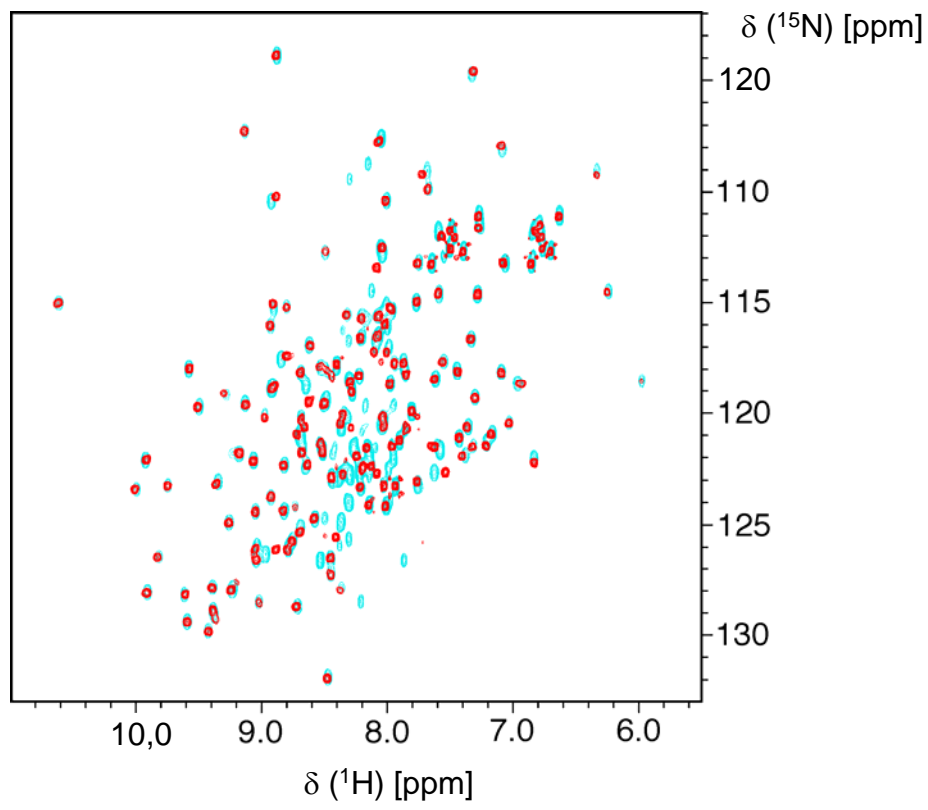

Supplement: pone.0011163.s002.pdf [file pone.0011163.s002.pdf]
