# Supplementary material for: Structural and Functional Study of Yer067w, a New Protein Involved in Yeast Metabolism Control and Drug Resistance
Source: PubMed Central journal article supplement (PMC2887356; doi:10.1371/journal.pone.0011163), 2010-06-17
Supplement: pone.0011163.s003.pdf [file pone.0011163.s003.pdf]

---

**SPELL results for genes co-regulated with *YER067W***

---

| <b>GO Term</b>                                                                         | <b>P-val</b> | <b>Annotated Genes</b>                         |
|----------------------------------------------------------------------------------------|--------------|------------------------------------------------|
| energy reserve metabolic process<br>(biological_process)                               | 2.25e-05     | GSY2, GLC3, TSL1, GSY1, TPS2                   |
| cellular carbohydrate metabolic process<br>(biological_process)                        | 5.22e-05     | GSY2, PGM2, GLC3, TSL1, SOL4, HXK1, GSY1, TPS2 |
| carbohydrate metabolic process<br>(biological_process)                                 | 1.01e-04     | GSY2, PGM2, GLC3, TSL1, SOL4, HXK1, GSY1, TPS2 |
| carbohydrate biosynthetic process<br>(biological_process)                              | 6.74e-04     | GSY2, GLC3, TSL1, GSY1, TPS2                   |
| glycogen biosynthetic process<br>(biological_process)                                  | 1.85e-03     | GSY2, GLC3, GSY1                               |
| UDP-glucosyltransferase activity<br>(molecular_function)                               | 2.39e-03     | GSY2, TSL1, GSY1                               |
| glycogen (starch) synthase activity<br>(molecular_function)                            | 2.87e-03     | GSY2, GSY1                                     |
| generation of precursor metabolites and energy (biological_process)                    | 3.61e-03     | STF2, GSY2, GLC3, TSL1, GSY1, TPS2             |
| glucosyltransferase activity<br>(molecular_function)                                   | 3.79e-03     | GSY2, TSL1, GSY1                               |
| trehalose-phosphatase activity<br>(molecular_function)                                 | 8.59e-03     | TSL1, TPS2                                     |
| glucan biosynthetic process<br>(biological_process)                                    | 9.40e-03     | GSY2, GLC3, GSY1                               |
| UDP-glycosyltransferase activity<br>(molecular_function)                               | 1.66e-02     | GSY2, TSL1, GSY1                               |
| alpha,alpha-trehalose-phosphate synthase complex (UDP-forming)<br>(cellular_component) | 1.72e-02     | TSL1, TPS2                                     |
| trehalose biosynthetic process<br>(biological_process)                                 | 1.72e-02     | TSL1, TPS2                                     |
| disaccharide biosynthetic process<br>(biological_process)                              | 1.72e-02     | TSL1, TPS2                                     |
| energy derivation by oxidation of organic compounds (biological_process)               | 1.75e-02     | GSY2, GLC3, TSL1, GSY1, TPS2                   |
| transferase activity, transferring hexosyl groups (molecular_function)                 | 2.79e-02     | GSY2, GLC3, TSL1, GSY1                         |
| glycogen metabolic process<br>(biological_process)                                     | 2.96e-02     | GSY2, GLC3, GSY1                               |
| polysaccharide biosynthetic process<br>(biological_process)                            | 4.38e-02     | GSY2, GLC3, GSY1                               |

---

**SPELL results for genes co-regulated with *YIL057C***

---

| <b>GOTerm</b>                                               | <b>P-val</b> | <b>Annotated Genes</b> |
|-------------------------------------------------------------|--------------|------------------------|
| peroxisome (cellular_component)                             | 5.95e-03     | PXA1, CTA1, POT1, ECI1 |
| microbody (cellular_component)                              | 5.95e-03     | PXA1, CTA1, POT1, ECI1 |
| ammonium transporter activity<br>(molecular_function)       | 3.45e-02     | ADY2, ATO2             |
| ammonium transport (biological_process)                     | 3.45e-02     | ADY2, ATO2             |
| organic cation transport<br>(biological_process)            | 3.45e-02     | ADY2, ATO2             |
| organic cation transporter activity<br>(molecular_function) | 3.45e-02     | ADY2, ATO2             |
| microbody part (cellular_component)                         | 3.87e-02     | PXA1, CTA1, POT1       |
| peroxisomal part (cellular_component)                       | 3.87e-02     | PXA1, CTA1, POT1       |

---
