# Supplementary material for: Structural and Functional Study of Yer067w, a New Protein Involved in Yeast Metabolism Control and Drug Resistance
Source: PubMed Central journal article supplement (PMC2887356; doi:10.1371/journal.pone.0011163), 2010-06-17
Supplement: pone.0011163.s004.pdf [file pone.0011163.s004.pdf]

| Transcription Factor binding motifs in YER067W promoter | Functional Description                                                                                                                                                                                                                        | Evidence                                                                                                           |
|---------------------------------------------------------|-----------------------------------------------------------------------------------------------------------------------------------------------------------------------------------------------------------------------------------------------|--------------------------------------------------------------------------------------------------------------------|
| <i>Energetic Metabolism</i>                             |                                                                                                                                                                                                                                               |                                                                                                                    |
| Adr1p                                                   | Carbon source-responsive zinc-finger transcription factor, required for transcription of the glucose-repressed gene ADH2, of peroxisomal protein genes, and of genes required for ethanol, glycerol, and fatty acid utilization               | <i>(Direct: ChIP-on-chip)</i><br>Workman CT et al., Science, 2006;312(5776):1054-59                                |
| Cat8p                                                   | derepression of a variety of genes under non-fermentative growth conditions, active after diauxic shift, binds carbon source responsive elements                                                                                              | <i>(Indirect: Microarrays - Wild type vs. TF mutant)</i><br>Young ET et al., J Biol Chem, 2003;78(28):26146-58     |
| Hap4p                                                   | Subunit of the heme-activated, glucose-repressed Hap2p/3p/4p/5p CCAAT-binding complex, a transcriptional activator and global regulator of respiratory gene expression; provides the principal activation function of the complex             | <i>Indirect: Microarrays - Wild type vs. TF mutant)</i><br>Lascaris R et al., Microbiology, 2004 Apr;150(0):929-34 |
| Stp1/Stp2                                               | Homologous transcription factors, activated by proteolytic processing in response to signals from the SPS sensor system for external amino acids; activates transcription of amino acid permease genes and may have a role in tRNA processing | <i>(Indirect: Microarrays - Wild type vs. TF mutant)</i><br>Eckert-Boulet N et al., Yeast, 2004;1(8):635-48        |
| <i>Stress Response</i>                                  |                                                                                                                                                                                                                                               |                                                                                                                    |

|              |                                                                                                                                                                                                                                                                       |                                                                                                                                                                                                                                                         |
|--------------|-----------------------------------------------------------------------------------------------------------------------------------------------------------------------------------------------------------------------------------------------------------------------|---------------------------------------------------------------------------------------------------------------------------------------------------------------------------------------------------------------------------------------------------------|
| Hsf1p        | Trimeric heat shock transcription factor, activates multiple genes in response to stresses                                                                                                                                                                            | <i>(Indirect: Microarrays - Wild type vs. TF mutant)</i><br>Yamamoto et al., J Biol Chem., 2005 Mar 25;280(12):11911-9<br><i>(Indirect: Proteome - Wild type vs. TF mutant)</i> Boy-Marcotte et al., Mol Microbiol, 1999; (2): 274-283.                 |
| Msn2/Msn4    | Homologous zinc finger transcriptional factors activated in several stress conditions, which results in translocation from the cytoplasm to the nucleus.                                                                                                              | <i>(Indirect: Microarrays - Wild type vs. TF mutant)</i><br>Gasch et al., Mol Biol Cell, 2000; (11): 4241-4257.<br><i>(Indirect: Proteome - Wild type vs. TF mutant)</i> Boy-Marcotte et al., Mol Microbiol, 1999; (2): 274-283.                        |
| Yap1p        | Basic leucine zipper (bZIP) transcription factor required for oxidative stress tolerance; activated by H <sub>2</sub> O <sub>2</sub> through the multistep formation of disulfide bonds and transit from the cytoplasm to the nucleus; mediates resistance to cadmium | <i>(Direct: ChIP-on-chip)</i><br>Workman CT et al., Science, 2006;312(5776):1054-59<br><i>(Indirect: Microarrays - Wild type vs. TF mutant)</i><br>Horan et al., Yeast, 2006;23(7):519-535<br>Thorsen et al., Physiol Genomics, 2007 Jun 19;30(1):35-43 |
| <i>Other</i> |                                                                                                                                                                                                                                                                       |                                                                                                                                                                                                                                                         |
| Fkh2p        | Forkhead family transcription factor with a major role in the expression of G2/M phase genes; positively regulates transcriptional elongation; negative role in chromatin silencing at HML and HMR; substrate of the Cdc28p/Clb5p kinas                               | <i>(Direct: ChIP-on-chip)</i><br>Workman CT et al., Science, 2006;312(5776):1054-59<br><i>(Direct: ChIP-on-chip)</i>                                                                                                                                    |
| Aft1p        | Transcription factor involved in iron utilization and homeostasis; activates                                                                                                                                                                                          | <i>(Indirect: Microarrays - Wild type vs. TF mutant)</i><br>Pagani et al., Mol                                                                                                                                                                          |

the expression of target genes in response to changes in iron availability

Microbiol, 2007  
Jul;65(1):521-537

| Transcription Factor binding motifs in YIL057C promoter | Functional Description                                                                                                                                                                                                                        | Evidence                                                                                                                                                              |
|---------------------------------------------------------|-----------------------------------------------------------------------------------------------------------------------------------------------------------------------------------------------------------------------------------------------|-----------------------------------------------------------------------------------------------------------------------------------------------------------------------|
| <i>Energetic Metabolism</i>                             |                                                                                                                                                                                                                                               |                                                                                                                                                                       |
| Adr1p                                                   | Carbon source-responsive zinc-finger transcription factor, required for transcription of the glucose-repressed gene ADH2, of peroxisomal protein genes, and of genes required for ethanol, glycerol, and fatty acid utilization               | <i>(Direct: ChIP-on-chip)</i><br>Tachibana C et al., Mol Cell Biol, 2005;25(6):2138-46<br><i>(Direct: ChIP)</i><br>Young ET et al., J Biol Chem, 2003;78(28):26146-58 |
| Stp1/Stp2                                               | Homologous transcription factors, activated by proteolytic processing in response to signals from the SPS sensor system for external amino acids; activates transcription of amino acid permease genes and may have a role in tRNA processing | <i>(Indirect: Microarrays - Wild type vs. TF mutant)</i><br>Eckert-Boulet N et al., Yeast, 2004;1(8):635-48                                                           |
| <i>Stress Response</i>                                  |                                                                                                                                                                                                                                               |                                                                                                                                                                       |
| Arr1p                                                   | Transcriptional activator of the bZIP family, required for transcription of genes involved in resistance to arsenic compounds                                                                                                                 | <i>(Indirect: Microarrays - Wild type vs. TF mutant)</i><br>Haugen AC et al., Genome Biol, 2004;5(12):R95                                                             |
| Sfp1p                                                   | Transcription factor that controls expression of many ribosome biogenesis genes in response to nutrients and stress, regulates G2/M transitions during mitotic cell cycle and DNA-damage                                                      | <i>(Indirect: Microarrays - Wild type vs. TF mutant)</i><br>Cipollina et al, Microbiology, ;154(1):337-46                                                             |

response, involved in cell size modulation

*Cell Cycle*

|       |                                                                                                                                                                                                                                                 |                                                                                                          |
|-------|-------------------------------------------------------------------------------------------------------------------------------------------------------------------------------------------------------------------------------------------------|----------------------------------------------------------------------------------------------------------|
| Fhl1p | Transcriptional activator with similarity to DNA-binding domain of <i>Drosophila</i> forkhead but unable to bind DNA in vitro; required for rRNA processing; isolated as a suppressor of splicing factor prp4                                   | ( <i>Direct: ChIP-on-chip</i> )<br>Kasahara et al, Mol Cell Biol, ;27(19):6686-705                       |
| Rap1p | DNA-binding protein involved in either activation or repression of transcription, depending on binding site context; also binds telomere sequences and plays a role in telomeric position effect (silencing) and telomere structure             | ( <i>Direct: ChIP-on-chip</i> )<br>Kasahara et al, Mol Cell Biol, ;27(19):6686-705                       |
| Xbp1p | Transcriptional repressor that binds to promoter sequences of the cyclin genes, CYS3, and SMF2; expression is induced by stress or starvation during mitosis, and late in meiosis; member of the Swi4p/Mbp1p family; potential Cdc28p substrate | ( <i>Indirect: Microarrays - Wild type vs. TF mutant</i> )<br>Chua G et al., PNAS, 2006;103(32):12045-50 |
| Yhp1p | One of two homeobox transcriptional repressors (see also Yox1p), that bind to Mcm1p and to early cell cycle box (ECB) elements of cell cycle regulated genes, thereby restricting ECB-mediated transcription to the M/G1 interval               | ( <i>Indirect: Microarrays - Wild type vs. TF mutant</i> )<br>Chua G et al., PNAS, 2006;103(32):12045-50 |
| Yox1p | Homeodomain-containing transcriptional repressor, binds to Mcm1p and to                                                                                                                                                                         | ( <i>Indirect: Microarrays - Wild type vs. TF mutant</i> )<br>Chua G et al., PNAS,                       |

|       |                                                                                                                                                                                                                                                 |                                                                                                      |
|-------|-------------------------------------------------------------------------------------------------------------------------------------------------------------------------------------------------------------------------------------------------|------------------------------------------------------------------------------------------------------|
|       | early cell cycle boxes (ECBs) in the promoters of cell cycle-regulated genes expressed in M/G1 phase; expression is cell cycle-regulated; potential Cdc28p substrate                                                                            | 2006;103(32):12045-50                                                                                |
| Tos8p | Homeodomain-containing transcription factor; SBF regulated target gene that in turn regulates expression of genes involved in G1/S phase events such as bud site selection, bud emergence and cell cycle progression; similarity to Cup9p       | <i>(Indirect: Microarrays - Wild type vs. TF mutant)</i><br>Chua G et al., PNAS, 2006;103(32):12045- |
|       | <i>Pseudohyphal growth</i>                                                                                                                                                                                                                      |                                                                                                      |
| Flo8p | Transcription factor required for flocculation, diploid filamentous growth, and haploid invasive growth; genome reference strain S288C and most laboratory strains have a mutation in this gene                                                 | <i>(Direct: ChIP-on-chip)</i><br>Borneman AR et al., Genes and Development, 2006;20(4):435-448       |
| Mga1p | Protein similar to heat shock transcription factor; multicopy suppressor of pseudohyphal growth defects of ammonium permease mutants                                                                                                            | <i>(Direct: ChIP-on-chip)</i><br>Borneman AR et al., Genes and Development, 2006;20(4):435-448       |
| Phd1p | Transcriptional activator that enhances pseudohyphal growth; regulates expression of FLO11, an adhesin required for pseudohyphal filament formation; similar to StuA, an <i>A. nidulans</i> developmental regulator; potential Cdc28p substrate | <i>(Direct: ChIP-on-chip)</i><br>Borneman AR et al., Genes and Development, 2006;20(4):435-448       |
| Sok2p | Nuclear protein that plays a                                                                                                                                                                                                                    | <i>(Direct: ChIP-on-chip)</i>                                                                        |

regulatory role in the cyclic AMP (cAMP)-dependent protein kinase (PKA) signal transduction pathway; negatively regulates pseudohyphal differentiation; homologous to several transcription factors

Borneman AR et al., *Genes and Development*, 2006;20(4):435-448

---
